# Supplementary material for: Genome of the pathogen Porphyromonas gingivalis recovered from a biofilm in a hospital sink using a high-throughput single-cell genomics platform
Source: HighWire-hosted journal article supplement (doi:10.1101/gr.150433.112), 2013-04-05
Supplement: SuppLegends.docx [file SuppLegends.docx]

**Supplemental Tables and Figure Legends.**

**Supplemental Fig. S1**. **Biofilm sample biomass and Fluorescence Activated Cell Sorting (FACS) biofilm sample.** (A) Sample biomass from sink drain biofilm obtained within a restroom adjacent to an emergency waiting room. Image show the collected biomass prior to any processing. (B) Sorting gates used to sort events after staining with sybergreen DNA stain. P1 represented high fluorescent particle events and background represents the region unstained sample events were located. After DNA staining, the high fluorescent P1 region was chosen as a sort gate.

**Supplementary Figure S2. Custom integrated Agilent Technologies BioCel 1200 liquid handling automated platform for high throughput single cell genomics.** The BioCel platform allows processing of more than 5,000 single cells per week through a multi-stage protocol that includes multiple displacement amplification (MDA) of DNA, MDA dilution and 16S rDNA PCR, MDA and PCR hit picking, Picogreen (Life Technologies) DNA quantitation, 16S Syto 9 (Life Technologies) melt curve assay, 16S rDNA Taqman qPCR, and SAP/Exonuclease I (Affymetrix) PCR treatment.  All liquid handling is performed on the BioCel with the BioRAPTR (Beckman Coulter) and Bravo (Agilent) performing non-contact dispensing and liquid transfer steps, respectively. The MDA isothermal reaction and PCR are performed offline on GeneAmp PCR system 9700 thermocyclers (Applied Biosystems), while TaqMan or melt curve analysis are performed in-line on the ABI 7900HT (Applied Biosystems). The platform includes barcode tracking of 384-well plates, and is integrated with a JCVI Laboratory Information Management System (LIMS).

**Supplemental Figure S3.** **Variation in coverage levels for the three single cell *P. gingivalis* MDAs**. The percent of bases with at least the indicated coverage is plotted.

**Supplemental Figure S4.** **Single nucleotide polymorphisms and read coverage across the reference strain TDC60**. Row 1) genes; Row 2) mobile elements; Rows 3-5) MDA SNPs at a coverage of 30×; Rows 6-8) Illumina read coverage; Rows 9-11) 454 read coverage. Read coverage is given for each on the x-axis and TDC60 genome position on the y-axis.

**Supplemental Figure S5.** **Taxonomic classification of the SPAdes *de novo* assembled contigs.** The largest proportion of the contigs of each assembled genome were classified as belonging to *Porphyromonas gingivalis* species using the MGTAXA tool.

**Supplemental Figure S6:** **Venn diagram depicting pangenome of *P.* *gingivalis*.** Data resulted from reciprocal BLASTp at 1e-9 cutoff analysis. Total gene counts are written above genome ID. Reference genomes are listed by their strain designation.

**Supplemental Figure S7. Comparisons of the allelic profiles for the 138 sequence types (isolates) available in the MLST database with the allelic profile for JCVI SC001.** A) Trees were generated using PHYLIP suite of programs (web-based tools available for the MLST database) to create trees from allelic profile data. A graphical representation of the tree was generated with Phylodendron. Scale bar is 0.1. B) Minimum-spanning tree. A minimum-spanning tree was generated from MLST profile data. (www.pubmlst.org). BURST clustering is used to give meaningful results. The two STs with the greatest number of single locus and then double locus variants are linked first, preferably using intermediate STs. ST-68 is the nearest sequence type and this sequence type is shared with *P. gingivalis* strain TDC60.

**Supplemental Table S1.** **Taxonomic diversity of bacterial open reading frames identified from assembled contigs derived from shallow 454 pyrosequencing belonging to the additional wells of interest.** The number of 454 reads ranged between 9,000 -10,000 for each sample. ORFs were identified and annotated by FragGeneScan (Rho et al. 2010) and METAREP (Goll et al. 2010), respectively.

**Supplemental Table S2.** **Read coverage and single nucleotide polymorphisms determined by mapping reads from individual MDA sets to the *de novo* assembled contigs generated from MDA3.** There were 3 SNPs shared in all MDAs limited to the 41% of the MDA3 contigs covered by MDA1 reads.

**Supplemental Table S3. Table of gene orthologs in JCVI SC001 across the available *P. gingivalis* genomes.**

**Supplemental Table S4**. **JCVI SCOO1 specific genes (524) identified via reciprocal best blast analysis.**
